# Supplementary material for: Holocene surface-rupturing earthquakes on the Dinaric Fault System, western Slovenia
Source: Copernicus journal article supplement (doi:10.5194/se-12-2211-2021), 2021-10-04
Supplement: Supplementary file 1 [file se-12-2211-2021-supplement.zip]

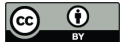

## *Supplement of*

# **Holocene surface-rupturing earthquakes on the Dinaric Fault System, western Slovenia**

**Christoph Grützner et al.**

*Correspondence to:* Christoph Grützner ([christoph.gruetzner@uni-jena.de](mailto:christoph.gruetzner@uni-jena.de))

- [se-12-2211-2021-supplement-title-page.pdf](#)
- [Supplement 1\\_Predjama1\\_NW.jpg](#)
- [Supplement 2\\_Predjama1\\_SE.jpg](#)
- [Supplement 3\\_Predjama2\\_NW.jpg](#)
- [Supplement 4\\_Predjama2\\_SE.jpg](#)
- [Supplement 5\\_Idrija\\_N.jpg](#)
- [Supplement 6\\_Idrija\\_S.jpg](#)
- [Supplement to Grützner et al.docx](#)

The copyright of individual parts of the supplement might differ from the article licence.
